# Supplementary material
Source: MDPI journal article supplement (https://www.mdpi.com/2313-576X/4/1/10)
Supplement: s1 [file s1]

**Supplementary Material Figure S1.**

”Speed Responses to Speed Humps as Affected by Time of Day and Light Conditions on a Residential Road with Light-Emitting Diode (LED) Road Lighting”. Jägerbrand et al. 2018.


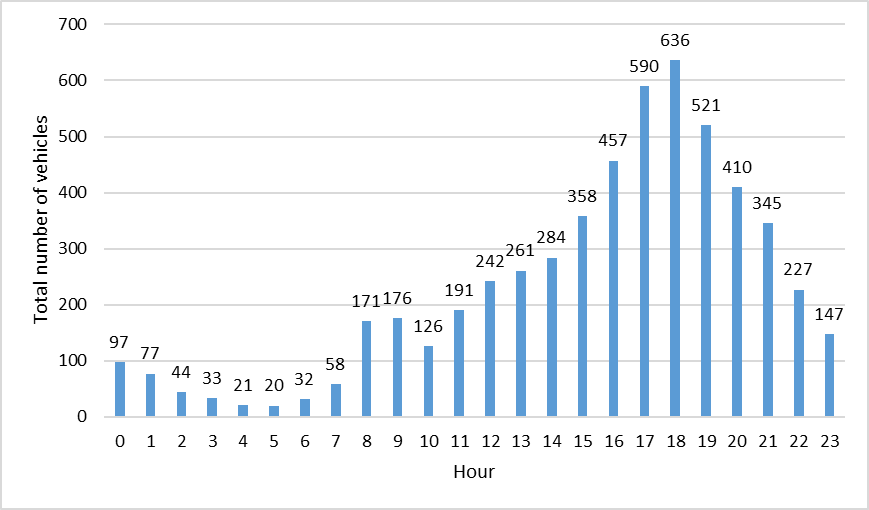


**Figure S1.** The total number of vehicles summed up per hour at the control location between 4 November 2014 17:48 and 10 November 13:15.
